# Supplementary material
Source: MDPI journal article supplement (https://www.mdpi.com/2075-4701/13/2/352)
Supplement: s1 [file s1 › metals-2184698-supplementary.pdf]

# Supplementary material for “Design and Characterization of Mg Alloy Pedicle Screws for Atlantoaxial Fixation”

Yunchuan Zhao, Haipo Cui \*, Xudong Guo and Chaohui Bu

Shanghai Institute for Minimally Invasive Therapy, University of Shanghai for Science and Technology,  
Shanghai 200093, China

\* Correspondence: h\_b\_cui@163.com

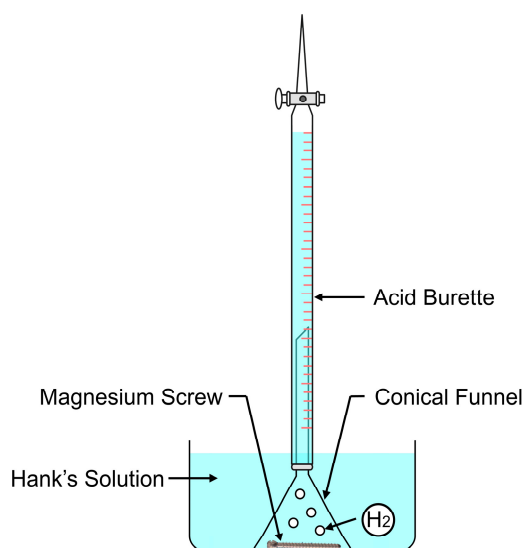

**Figure S1.** Setup of immersion test.
